# Supplementary material
Source: PubMed Central journal article supplement (PMC8433266)

## **Supplementary Material**

### **Protective role of activated protein C against viral mimetic poly(I:C)-induced inflammation**

Xiaofeng Cai<sup>1</sup>, Sumith R. Panicker<sup>1</sup>, Indranil Biswas<sup>1</sup>, Hemant Giri<sup>1</sup>, and Alireza R. Rezaie<sup>1,2\*</sup>

<sup>1</sup>Cardiovascular Biology Research Program, Oklahoma Medical Research Foundation, Oklahoma City, Oklahoma 73104.

<sup>2</sup>Department of Biochemistry and Molecular Biology, University of Oklahoma Health Sciences Center, Oklahoma City, Oklahoma 73104.

\*To whom correspondence should be addressed: Alireza R. Rezaie, Ph.D., Cardiovascular Biology Research Program, Oklahoma Medical Research Foundation, Oklahoma City, OK 73104. Tel: (405) 271-4711 E-mail: [Ray-Rezaie@omrf.org](mailto:Ray-Rezaie@omrf.org)

## Supplementary Figure Legends

**Supplementary Fig. S1, related to Fig. 1. Poly(I:C) induces histone extranuclear translocation in endothelial cells.** Immortalized HDMECs were stimulated with poly(I:C) (10  $\mu\text{g}/\text{mL}$ ) for indicated time points (1, 3, 6 h). Cells were fixed and permeabilized before staining of histone H3 with mouse anti-H3 antibody and Alexa Fluor 488-conjugated goat anti-mouse IgG. The nucleus was stained with DAPI. Immunofluorescence images were obtained with confocal microscopy. Arrows indicate extranuclear translocation of histone H3. Scale bar: 20  $\mu\text{m}$ . Data quantitation is shown as means  $\pm$  standard error from at least 3 independent experiments. \*\* $p < 0.01$ , \*\*\* $p < 0.001$ . Ctrl, control.

**Supplementary Fig. S2, related to Fig. 2. EPCR and PAR1 are required for APC inhibition of poly(I:C)-induced histone extranuclear translocation in endothelial cells.** HDMECs were pretreated with EPCR or PAR1 function-blocking antibodies (15–20  $\mu\text{g}/\text{mL}$  for 1h) followed by treatment with APC (20 nM for 3h) before stimulation with poly(I:C) (10  $\mu\text{g}/\text{mL}$  for 1h). Cells were fixed and permeabilized, followed by staining for histone H3 with rabbit anti-histone H3 antibody and Alexa Fluor 488-conjugated goat anti-rabbit IgG. DNA was stained with DAPI. Immunofluorescence images were taken by confocal microscopy. Arrows indicate extranuclear translocation of histone H3. Scale bar: 20  $\mu\text{m}$ . Data quantitation is shown as means  $\pm$  standard error from at least 3 independent experiments. \*\* $p < 0.01$ . Ctrl, control.

**Supplementary Fig. S3, related to Fig. 7. Poly(I:C) elevates integrin Mac-1 expression in neutrophils in mice.** Mice were injected i.p. with poly(I:C) (110 $\mu\text{g}/\text{mouse}$ ) for 6 and 24h followed by blood collection and staining for Ly6G-FITC & Mac-1-PE. The cell surface expression of Mac-1 in Ly6G-FITC-positive neutrophil population was measured by the flow cytometry. Representative data were obtained from 3-5 mice per group (n = 3-5).

**Supplementary Fig. S4, related to Fig. 7. Poly(I:C) downregulates thrombomodulin expression in mice.** Mice were injected i.p. with poly(I:C) (110 $\mu$ g/mouse) for 24h and liver, kidney and lung tissues were collected, processed and stained with rat anti-thrombomodulin antibody and Alexa Fluor 488-conjugated goat anti-rat IgG. The nucleus was stained with DAPI. Immunofluorescence images were taken by confocal microscopy. Representative images were obtained from 3-5 mice per group (n = 3-5). Scale bar: 50  $\mu$ m.

**Supplementary Fig. S5, related to Fig. 7. Poly(I:C) does not affect EPCR expression in mice.** Mice were injected i.p. with poly(I:C), and lung tissue was harvested for lysis. Tissue lysates were immunoblotted for EPCR and  $\beta$ -actin. The relative expression levels of EPCR are presented.

**Supplementary Fig. S6, related to Fig. 8. EPCR and PAR1 are required for APC inhibition of poly(I:C)-induced permeability in endothelial cells.** HDMECs were pretreated with EPCR or PAR1 function-blocking antibodies (15–20  $\mu$ g/mL for 1h) followed by treatment with APC (20 nM for 3h) before stimulation with poly(I:C) (10  $\mu$ g/mL for 4h). The amount of Evans blue dye that leaked into the lower chamber in the Trans-well assay plates was measured. Results are shown as means  $\pm$  standard error from at least 3 independent experiments. \*p < 0.05, \*\*p < 0.01.

Supplementary Figure S1, related to Fig. 1

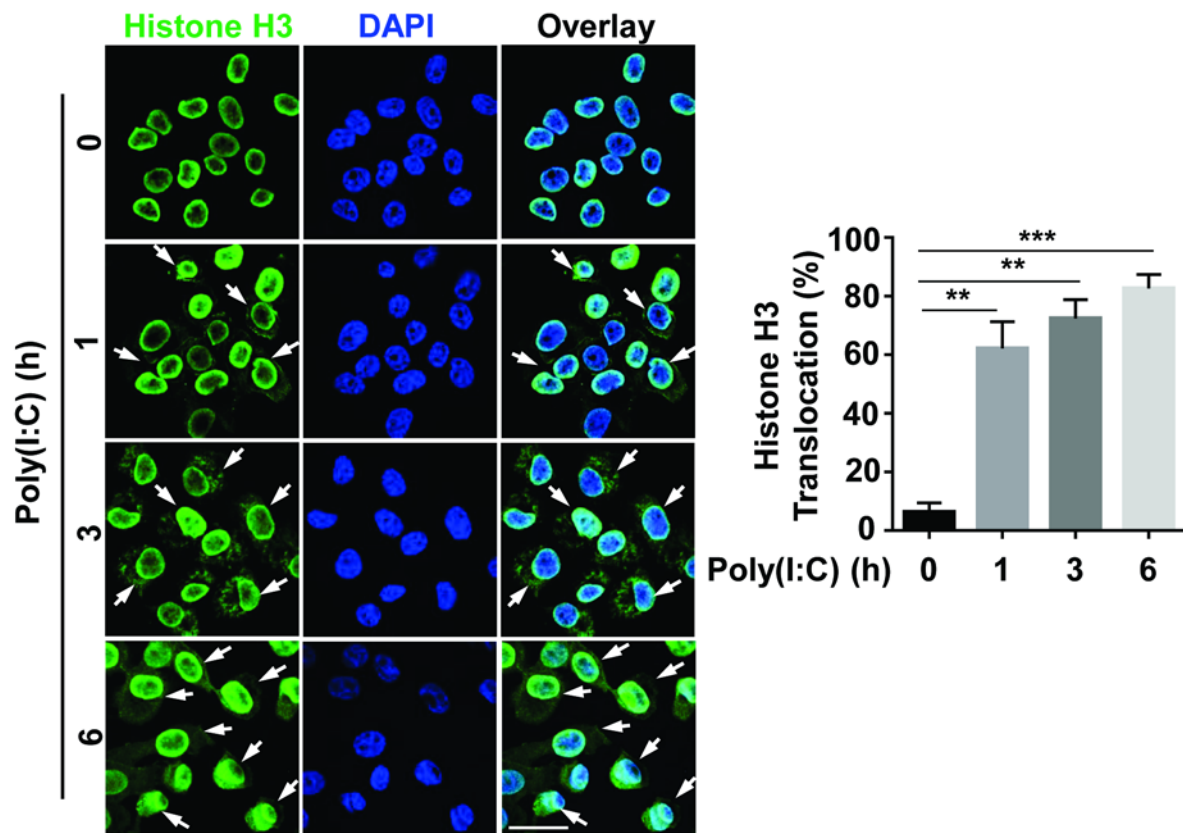

Supplementary Figure S2, related to Fig. 2

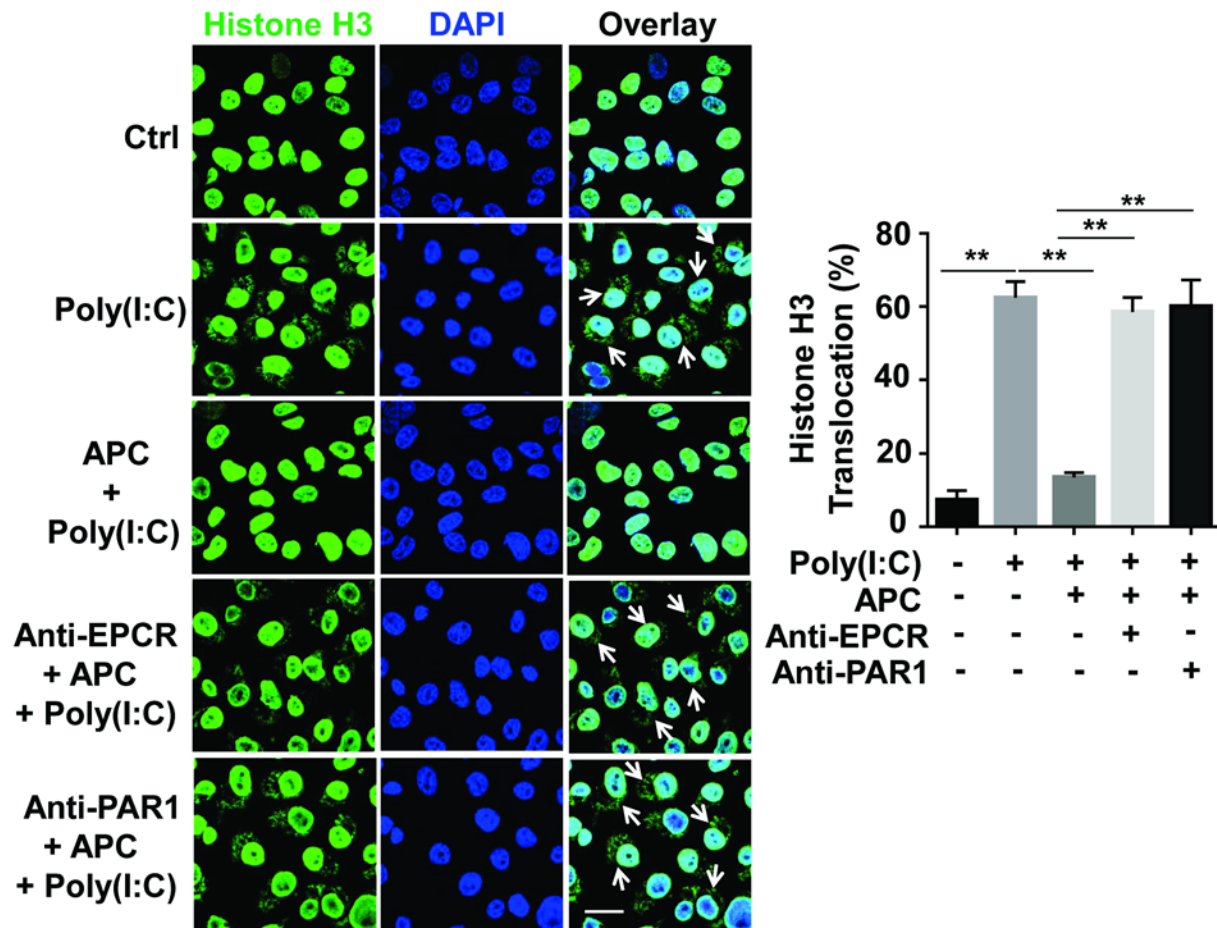

Supplementary Figure S3, related to Fig. 7

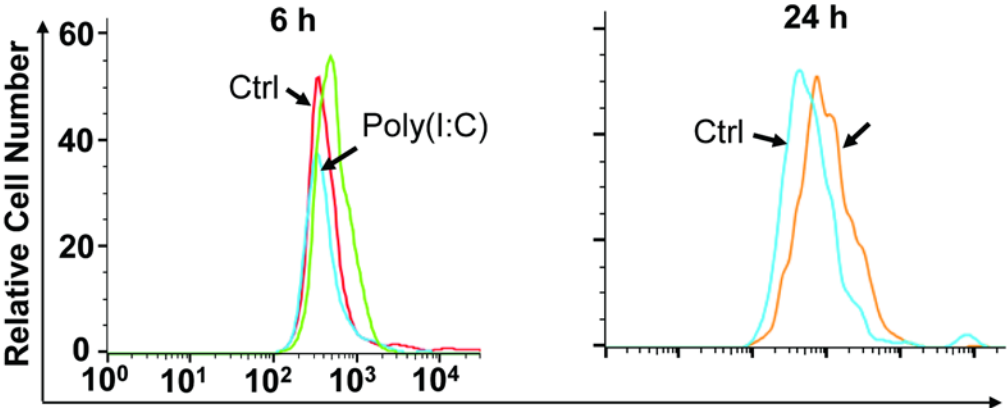

Supplementary Figure S4, related to Fig. 7

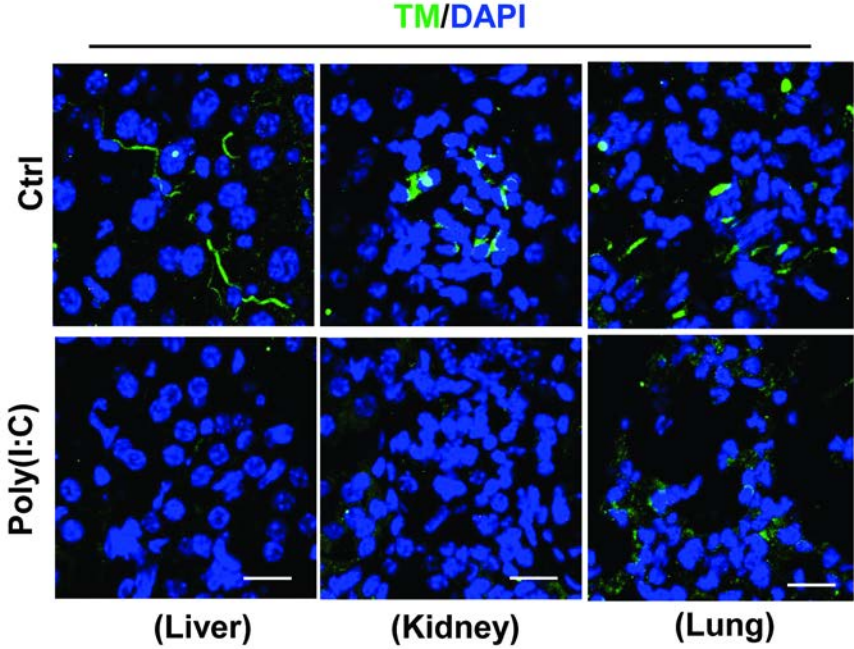

Supplementary Figure S5, related to Fig. 7

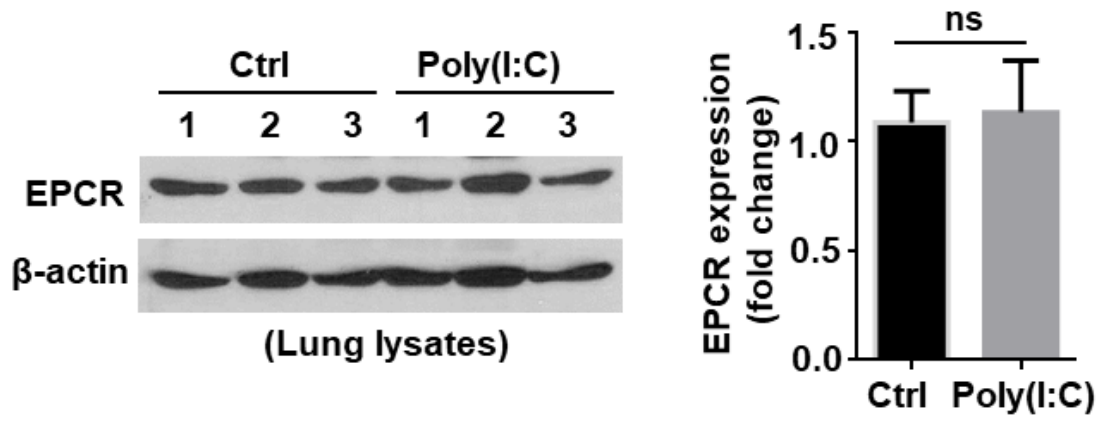



Supplementary Figure S6, related to Fig. 8

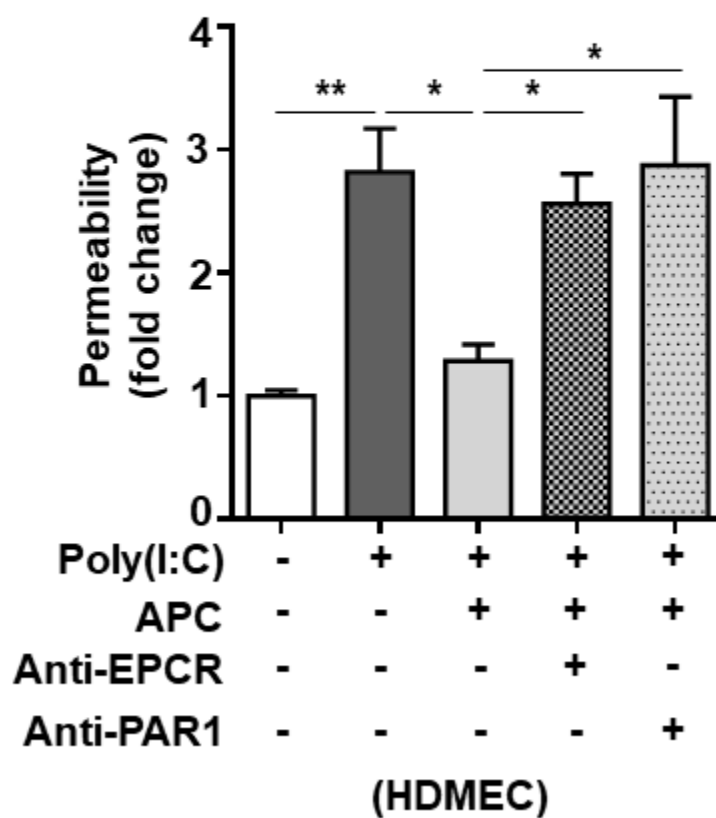

Supplement: NIHMS1668383-supplement-Supplementary_Materials.pdf [file NIHMS1668383-supplement-Supplementary_Materials.pdf]
